# Supplementary material for: Effects of Different Types of Stabilizers on the Properties of Foam Detergent Used for Radioactive Surface Contamination
Source: MDPI journal article supplement (doi:10.3390/molecules28166107), 2023-08-17
Supplement: s1 [file s1]

# Supplementary Materials

## Effects of Different Types of Stabilizers on the Properties of Foam Detergent Used for Radioactive Surface Contamination

Hao Zhang <sup>1,2</sup>, Lili Liang <sup>2</sup>, Hailing Xi <sup>3,\*</sup>, Xiaoyan Lin <sup>2,\*</sup>, Zhanguo Li <sup>3</sup> and Yu Jiao <sup>1</sup>

<sup>1</sup> School of Science, Xichang University, Xichang 615013, China

<sup>2</sup> Engineering Research Center of Biomass Materials, Ministry of Education, School of Materials Science and Engineering, Southwest University of Science and Technology, Mianyang 621010, China

<sup>3</sup> State Key Laboratory of NBC Protection for Civilian, Beijing 102205, China;

\* Correspondence: xihailing@sklnbcpc.cn (H.X.); linxiaoyan@swust.edu.cn (X.L.)

**Table S1.** Principles, advantages and drawbacks of common radioactive surface decontamination methods

| Decontamination method | Principles                                                                                                                              | Advantages                                                                                         | Drawbacks                                                                                                   | Reference |
|------------------------|-----------------------------------------------------------------------------------------------------------------------------------------|----------------------------------------------------------------------------------------------------|-------------------------------------------------------------------------------------------------------------|-----------|
| Mechanical             | Removal of surface contamination by wiping, scraping, suction, etc.                                                                     | Easy to operate, simple equipment                                                                  | Easy to cause surface damage, the solution produces radioactive aerosol, low decontamination rate           | [6,7]     |
| High-pressure water    | Pressurized water is used to wash away soluble contaminants and some particles from the surface.                                        | Unlimited surface shape, fast decontamination, and used for large area contamination               | A good deal of radioactive waste liquid, easy to cause secondary pollution, and low decontamination rate    | [6]       |
| Laser                  | The laser beam vaporizes the contaminants by heat and separates them from the surface.                                                  | High decontamination rate, good accuracy and less radioactive waste                                | Generates radioactive aerosols, high decontamination costs, and usually used to decontaminate metal surface | [4,8]     |
| Ultrasonic             | Contaminants are removed from the surface by the cavitation and direct flow of ultrasound in the liquid.                                | Less restricted by surface shape, less damage to the surface and less chemical reagent consumption | Unsuitable for large area decontamination, and may cause damage to the bonding site                         | [9,10]    |
| Reagent Washing        | The solution containing chemical reagents such as acids, bases, oxidants and chelators is used to dissolve surface contaminants.        | Less restricted by surface shape and high decontamination rate                                     | Easy to corrode the surface, consume lots of chemical reagents and produce much waste liquid                | [11,12]   |
| Electrochemistry       | Through the principle of electrolysis, the surface contaminants placed on the anode are dissolved in the electrolyte.                   | Less chemical reagent consumption and high decontamination rate                                    | Not suitable for decontaminating large objects, usually used for metal surfaces, and expensive costs        | [13]      |
| Gel                    | The gel adheres to surface for a long time, and the pollutants enters the gel for decontamination.                                      | Decontamination is not limited by surface shape and can be used on inclined and vertical surfaces. | Complicated recovery of gels and low decontamination rate                                                   | [5,14]    |
| Peelable Film          | After the film-forming solution is sprayed onto the surface and dried, the contamination is adhered or absorbed into the peelable film. | No secondary pollution, and less radioactive waste                                                 | Long drying time to form film, complex peeling and recycling of the film, and expensive costs               | [15,16]   |

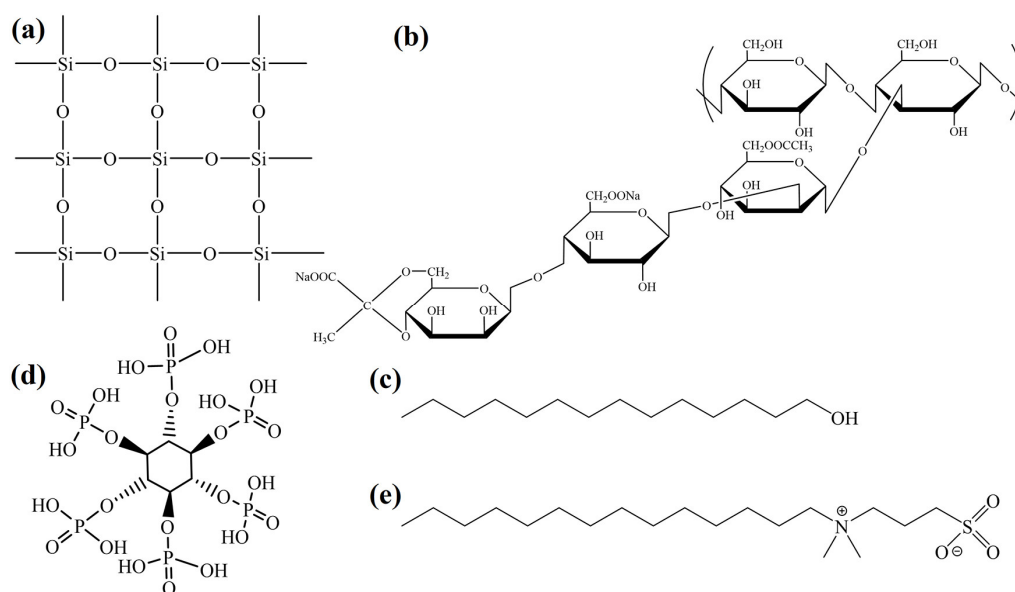

**Figure S1.** Chemical structures of (a)NS<sup>[20, 28]</sup>, (b) XG<sup>[18]</sup>, (c) TD<sup>[24]</sup>, (d) PA<sup>[25]</sup> and (e)NDMP<sup>[24]</sup>
